# Supplementary material for: The Strongyloides stercoralis-hookworms association as a path to the estimation of the global burden of strongyloidiasis: A systematic review
Source: PubMed Central journal article supplement (PMC7188296; doi:10.1371/journal.pntd.0008184), 2020-04-13
Supplement: pntd.0008184.s002.pdf [file pntd.0008184.s002.pdf]

**S2 Table. Gather checklist**

| Item #                                                                                      | Checklist item                                                                                                                                                                                                                                                                                                                                | Reported on page #                 |
|---------------------------------------------------------------------------------------------|-----------------------------------------------------------------------------------------------------------------------------------------------------------------------------------------------------------------------------------------------------------------------------------------------------------------------------------------------|------------------------------------|
| Objectives and funding                                                                      |                                                                                                                                                                                                                                                                                                                                               |                                    |
| 1                                                                                           | Define the indicator(s), populations (including age, sex, and geographic entities), and time period(s) for which estimates were made.                                                                                                                                                                                                         | Methods: paragraphs 2 to 6         |
| 2                                                                                           | List the funding sources for the work.                                                                                                                                                                                                                                                                                                        | N/A                                |
| Data Inputs                                                                                 |                                                                                                                                                                                                                                                                                                                                               |                                    |
| <i>For all data inputs from multiple sources that are synthesized as part of the study:</i> |                                                                                                                                                                                                                                                                                                                                               |                                    |
| 3                                                                                           | Describe how the data were identified and how the data were accessed.                                                                                                                                                                                                                                                                         | Methods: paragraph 1               |
| 4                                                                                           | Specify the inclusion and exclusion criteria. Identify all ad-hoc exclusions.                                                                                                                                                                                                                                                                 | MethodS: paragraph 2 to 5          |
| 5                                                                                           | Provide information on all included data sources and their main characteristics. For each data source used, report reference information or contact name/institution, population represented, data collection method, year(s) of data collection, sex and age range, diagnostic criteria or measurement method, and sample size, as relevant. | Supporting Information : S4 and S5 |

|                                                                                                       |                                                                                                                                                                                                                                                                                                                                                                                              |                                   |
|-------------------------------------------------------------------------------------------------------|----------------------------------------------------------------------------------------------------------------------------------------------------------------------------------------------------------------------------------------------------------------------------------------------------------------------------------------------------------------------------------------------|-----------------------------------|
| <b>6</b>                                                                                              | Identify and describe any categories of input data that have potentially important biases (e.g., based on characteristics listed in item 5).                                                                                                                                                                                                                                                 | Methods:<br>paragraph<br>8        |
| <i>For data inputs that contribute to the analysis but were not synthesized as part of the study:</i> |                                                                                                                                                                                                                                                                                                                                                                                              |                                   |
| <b>7</b>                                                                                              | Describe and give sources for any other data inputs.                                                                                                                                                                                                                                                                                                                                         | N/A                               |
| <i>For all data inputs:</i>                                                                           |                                                                                                                                                                                                                                                                                                                                                                                              |                                   |
| <b>8</b>                                                                                              | 1. Provide all data inputs in a file format from which data can be efficiently extracted (e.g., a spreadsheet rather than a PDF), including all relevant meta-data listed in item 5. For any data inputs that cannot be shared because of ethical or legal reasons, such as third-party ownership, provide a contact name or the name of the institution that retains the right to the data. | Supporting<br>Information<br>: S4 |
| <b>Data analysis</b>                                                                                  |                                                                                                                                                                                                                                                                                                                                                                                              |                                   |
| <b>9</b>                                                                                              | Provide a conceptual overview of the data analysis method. A diagram may be helpful.                                                                                                                                                                                                                                                                                                         | Method,<br>paragraphs<br>9 and 10 |
| <b>10</b>                                                                                             | Provide a detailed description of all steps of the analysis, including mathematical formulae. This description should cover, as relevant, data cleaning, data pre-processing, data adjustments and weighting of data sources, and mathematical or statistical model(s).                                                                                                                      | Method,<br>paragraphs<br>9 and 10 |
| <b>11</b>                                                                                             | Describe how candidate models were evaluated and how the final model(s) were selected.                                                                                                                                                                                                                                                                                                       | N/A                               |
| <b>12</b>                                                                                             | Provide the results of an evaluation of model performance, if done, as well as the results of any relevant sensitivity analysis.                                                                                                                                                                                                                                                             | N/A                               |

|                        |                                                                                                                                                                  |                               |
|------------------------|------------------------------------------------------------------------------------------------------------------------------------------------------------------|-------------------------------|
| <b>13</b>              | Describe methods for calculating uncertainty of the estimates. State which sources of uncertainty were, and were not, accounted for in the uncertainty analysis. | N/A                           |
| <b>14</b>              | State how analytic or statistical source code used to generate estimates can be accessed.                                                                        | N/A                           |
| Results and Discussion |                                                                                                                                                                  |                               |
| <b>15</b>              | Provide published estimates in a file format from which data can be efficiently extracted.                                                                       | Results Table 1               |
| <b>16</b>              | Report a quantitative measure of the uncertainty of the estimates (e.g. uncertainty intervals).                                                                  | Results Table 1               |
| <b>17</b>              | Interpret results in light of existing evidence. If updating a previous set of estimates, describe the reasons for changes in estimates.                         | Discussion paragraphs 4 and 5 |
| <b>18</b>              | Discuss limitations of the estimates. Include a discussion of any modelling assumptions or data limitations that affect interpretation of the estimates.         | Discussion paragraph 7        |
