# Supplementary material for: The Strongyloides stercoralis-hookworms association as a path to the estimation of the global burden of strongyloidiasis: A systematic review
Source: PubMed Central journal article supplement (PMC7188296; doi:10.1371/journal.pntd.0008184), 2020-04-13
Supplement: pntd.0008184.s004.pdf [file pntd.0008184.s004.pdf]

### **S1 File. Example of the search strategy**

Search date: 6 June 2018

Database: Ovid MEDLINE(R) Epub Ahead of Print, In-Process & Other Non-Indexed Citations,

Ovid MEDLINE(R) Daily and Ovid MEDLINE(R) <1946 to Present>

Search Strategy:

- 
- 1 (strongyloid\* or S stercoralis or eststrongyloid\* or eststrongiloid\*).mp. (6269)
  - 2 (hook worm or hook-worm or hookworm or ancylostom\* or necator\* or uncinaria).mp. (8490)
  - 3 exp STRONGYLOIDES/ or exp STRONGYLOIDES STERCORALIS/ (2302)
  - 4 exp ANCYLOSTOMATOIDEA/ (2385)
  - 5 1 or 3 (6269)
  - 6 2 or 4 (8490)
  - 7 5 and 6 (832)

8 limit 7 to yr="1988 -Current" (506)

9 7 and 8 (506) Search date: 6 June 2018

Database: Ovid MEDLINE(R) Epub Ahead of Print, In-Process & Other Non-Indexed Citations,

Ovid MEDLINE(R) Daily and Ovid MEDLINE(R) <1946 to Present
